# Supplementary material
Source: PubMed Central journal article supplement (PMC4914176)
Supplement: pnas.1606241113.sd01.pdf [file pnas.1606241113.sd01.pdf]

>C\_reinhardtii\_A8IKQ0

ELATVISSVSLACKQIASLVNRAGISN~LTG~~VAGNQNVQGED~~QKKLDVVSNEVFKN  
CLASCGRTGVIA~SEEDQPVAVEE~~TYSNGYIVVFDPLDGSSNIDAGISVGSIFGIYE  
PS~~~~~EECPIDD~~~~~PQKMMEQCVMNVCQPGSRLKACAGYCLY  
SSSTIMVLTIG~~NGVFG~~FTL~~~DPLVGEFVLTHPNVQIPEVVKIYSFNEGNYGL~W  
DDSVKAYMDSL~KDPKKWDGKPYASARYIGSLVGDHRTLLYG~GIYGYPGD~~~AKNKNK  
KLRLLYECAPMSFIAEQAGGLGS~TGQE~RVLDVNPEKVHQRVPLFIGSKKEVEYLESFT  
K

>Pp1s153\_72V6\_1

ELTIVLSSISLACKQIASLVQRAGISN~LTG~~LQGVANIQGED~~QKKLDVISNEVFSS  
CLRSSGRTGIIA~SEEDTPVAVEE~~SYSGNYIVVFDPLDGSSNIDAAVSTGSIWGIYK  
PN~~~~~EECLTEN~~~~~PTIDEVAQNCVVNVCQPGSNLLSAGYCMY  
SSSVILVLSVG~~HGVIY~~FTL~~~DPLYGEFVLSHEEIKIPKSGKIYSFNEGNYAL~W  
DDKLLKYYVDSL~KDPG~PSGKPYASARYIGSLVGDHRTMLYG~GIYGYPRD~~~SKSKNG  
KLRLLYECAPMSYLAEQAGGKGS~DGHQ~RILDIQPEQVHQRVPLYVGSSTEEVEKLEKFL  
A

>Pp1s20\_373V6\_2

ELTIVLSSIALACKQIASLVQRAGISN~MTG~~LQGAANIQGED~~QKKLDVISNEVFSS  
CLRSSGRTGIIA~SEEDTPVAVEE~~SYSGNYIVVFDPLDGSSNIDAAVSTGSIWGIYK  
PN~~~~~EECLTEE~~~~~PTIDEIAENCVVNVCQPGSNLLSAGYCMY  
SSSVILVLSVG~~DGVYV~~FTL~~~DPLYGEFVLSHDNIQIPKSGKIYSMNEGNYAL~W  
DDNLKKYVDSL~KDPG~TSGKPYASARYIGSLVGDHRTMLYG~GIYGYPRD~~~SKSKNG  
KLRLLYECAPMSYLAEQAGGKGS~DGHQ~RILDIQPEQVHQRVPLYVGSVEEVEKLESFL  
S

>A\_thaliana\_P25851

ELTIVMSSISLACKQIASLVQRAGISN~LTG~~VQAVNIQGED~~QKKLDVISNEVFSN  
CLRSSGRTGIIA~SEEDVAVAVEE~~SYSGNYVVVFDPLDGSSNIDAAVSTGSIWGIYS  
PN~~~~~DECIVDDSDDISALGSEEQRCIVNVCQPGNNLLAAGYCMY  
SSSVIFVLTIG~~KGVFS~~FTL~~~DPMYGEFVLTQENIEIPKAGRIYSFNEGNYQM~W  
DDKLLKYYIDDL~KDPG~PTGKPYASARYIGSLVGDHRTLLYG~GIYGYPRD~~~AKSKNG  
KLRLLYECAPMSFIVEQAGGKGS~DGHS~RVLDIQPTEIHQRVPLYIGSTEEVEKLEKYL  
A

>Osmunda\_UOMY\_2080119

ELTIVLSSISLACKQIASLVQRAGISN~LTG~~VQAVNVQGED~~QKKLDVISNEVFSN  
CLRSSGRTGIIA~SEEDTPVAVEE~~SYSGNYIVVFDPLDGSSNIDAAVSTGSIWGIYR  
PT~~~~~EECLADL~DDNPTLDQIAQNCVVNVCQPGSNLLAAGYCMY  
SSSVIMVLSVG~~KGVYV~~FTL~~~DPLYGEFVLTHTDSIKVPTSGKIYSFNEGNYQL~W  
DDKLLKYYIDDL~KDPG~SSGKPYASARYIGSLVGDHRTMLYG~GIYGYPSD~~~TKSKNG  
KLRLLYECAPMSFLAEQAGGKGS~DGHK~RILDIEPDQIHQRVPLYVGSVEEVEKLEKYL  
~

>H\_ciliata\_YWNF\_2001606

ELTIVLSSIALACKQIASLVQRAGISN~LTG~~LQGAANIQGED~~QKKLDVISNEVFSS  
CLRSSGRTGIIA~SEEDIPVAVEE~~SYSGNYIVVFDPLDGSSNIDAAVSTGSIWGIYR  
PN~~~~~EECLTNLGET~PTIDEVAENCVVNVCQPGSNLLSAGYCMY  
SSSVILVLSVG~~DGVYV~~FTL~~~DPLYGEFVLSHDKIQIPKSGKIYSMNEGNYAL~W  
DDNLKKYVDSL~KDPG~ASGKPYASARYIGSLVGDHRTMLYG~GIYGYPKD~~~AKSKTG  
KLRLLYECAPMSYLAEQAGGKGS~DGHQ~RILDIQPDQVHQRVPLYVGSVEEVEKLESFL  
A

>O\_sativa\_B0LSR2

EMTIVLASISTACKQIASLVQRAPISN~LTG~~VQAVNVQGED~~QKKLDVVSNEVFSN  
CLKSSGRTGVIA~SEEDVAVAVEE~~SYSGNYIVVFDPLDGSSNIDAAVSTGSIWGIYS  
PN~~~~~DECLADIADD~QNLQDQVEQRCIVSVCQPGSNLLAAGYCMY  
SSSVIFVLTIG~~TGVYV~~FTL~~~DPMYGEFVLTQEKVQIPKAGKIYAFNEGNYAL~W  
DDKLLKSYMDSL~KEPG~~SGKPYASARYIGSLVGDHRTLLYG~GIYGYPRD~~~QKSKNG  
KLRLLYECAPMSFIVEQAGGKGS~DGHQ~RILDIMPTEIHQRVPLYIGSVVEEVEKLEKFL  
A

>Populus\_trichocarpa\_A9PGB1

ELTIVISSISMACKQIASLVQRASISN~LTG~~VQGSVNVQGED~~QKKLDVVSNEVFSS  
CLRSSGRTGIIA~SEEDVAVAVEE~~SYSGNYIVVFDPLDGSSNIDAAVSTGSIWGIYS  
PN~~~~~DECLADIGDD~STLDQTEQRCIVNVCQPGNNLLVAGYCMY  
SSSVIFVLTIG~~KGVFS~~FTL~~~DPMYGEFVLTQENIQIPKAGKIYSFNEGNYQL~W  
DDKLLKYYIDDL~KDPG~PSGKPYASARYIGSLVGDHRTLLYG~GIYGYPRD~~~KSKNG  
KLRLLYECAPMSFIVEQAGGKGS~DGHQ~RVLDITPTEIHQRVPLYIGSVVEEVEKLEKYL

A

>Mesataenium\_endlicherianum\_WDCW\_2004804  
ELTVVLSSISLACKQIASLVQRAGISK~ITG~~VQGAVNVQGED~~QKKLDVISNEVFGN  
CLRASGRTGIIA~SEEDDKPVAVEE~~SYSGSYVVVFDPLDGSSNIDAAVSTGSIFGIYR  
SA~~~~~EGCFADLGDD~PTLDNIEKACIANVCQPGSSLLAAGYCMY  
SSSVILVLSVG--TGVIYV~~FTL~~~DPMHGEFVLTHEKIKIPSCGSIYSFNEGNSAL~W  
SDNLRAYMASL~KDPAQNSGKPYASARYIGSLVGDVDFHRTLLYG~GIYGYPPD~~~TKNANG  
KLRLLYECAPMSYLAEQAGGRGS~DGHR~RVLDIVPHQVHQRVPLFIGSSEEVEKLERYL

A

>Mesataenium\_endlicherianum\_WDCW\_2004803  
ELTIVLSSITLACKQIASLVQRAGISS~LTG~~VQGAVNVQGED~~QKKLDVISNEVFGH  
CLRASGRTGIIA~SEEDDTPVAVEE~~SYSGNYVVVFDPLDGSSNIDAAVSTGSIFGIYK  
SE~~~~~EGCFNLGDD~PTLGEVEATCIANVCQPGTNLLAAGYCMY  
SSSVIMVLSVG--TGVIYV~~FTL~~~DPMYGEFVLTHEKIQIPKKGSIYSFNEGNAL~W  
TDKLLKMYMDSL~KEPELNGGKPYASARYIGSLVGDVDFHRTMLYG~GIYGYPPD~~~SKNVNG  
KLRLLYECAPMSYLAEQAGGKGS~DGTK~RVLDIIPKVVHQRVPLFIGSVDEVKLEKYL

A

>Mesataenium\_endlicherianum\_WDCW\_2045850  
DLTILLSHIVLGCKFVCSAVNKAGLAK~LIG~~LAGETNVQGE~~QKKLDVLSNEVFIN  
ALRGSGRANILV~SEENEPIYIEA~~AKRGYCVVFDPLDGSSNIDCGVSI GTIFGIYM  
LP~~~NNSEGLQDVL~~~~~QPGTKMVAAGYCMY  
GSSCTLVLSVG--QGVHG~~FTL~~~DPSLGEFILTHPDIKIPKKGKIYSVNEGNAKN~W  
DEPTTKFVEKC~KFPT~DGSSPKSLRYIGSMVADVHRTLLYG~GIFLYPAD~~~KKSPNG  
KLRVLYEVFPMSYLMQAGGQAF~TGSE~RALELQPKKIHDRSPIFLGSTDDVEEIKALY

A

>C\_chlorochromatii\_Q3AT00  
ELTDLLTDVAFAAKLVREVVRAGLVD~ILG~~LAGSTNVQGE~~VKKLDLDFANEQIIS  
AIGAHRFAVMG~SEENEII IPTN~~NESGNYVLLFDPLDGSSNIDVNVSVGTIFSIYK  
LKT~SDPAKASLADCL~~~~~QAGSEQVAAGYVIY  
GSSVVMVYTTG~~HGVHG~~FTY~~~DPTIGEFLLSDENITTPKRGKYISMNEGSAQ~F  
NEGTKRYLDYI~KTEDKATNRPYSTRYIGSLVADVHRTLLTG~GIFLYPPT~~~GKHPNG  
KLRLMYEANPLAFICEQAGGRAT~NGKE~RILDIKPTLHQRTPLYIGSTDDVMVAEEFE

Q

>H\_sapiens\_P09467  
ELTQLLNSLCTAVKAISSAVRKAGIAH~LYG~~IAGSTNVTDGQ~~VKKLDVLSNDLVMN  
MLKSSFATCVLV~SEEDKHAIIVEP~~EKRGKYVVCFDPLDGSSNIDCLVSVGTIFGIYR  
KK~~~STDEPSEKDAL~~~~~QPGRNLVAAGYALY  
GSATMLVLAMD~~CGVNC~~FML~~~DPAIGE FILVDKDVKIKKKGKIYSLNEGYARD~F  
DPAVTEYIQRK~KFPP~DNSAPYGARYVGSMAVADVHRTLVYG~GIFLYPAN~~~KKSPNG  
KLRLLYECNPMAYVMEKAGGMAT~TGKE~AVLDVIPTDIHQRAPVILGSPDDVLEFLKVY

E

>X\_tropicalis\_F6XZD1  
ELTQLLNSMCTAIKAISSAVRKAGLAN~LKG~~TFQLT~VLAHDSILCCTRKMITCNVFP  
KCHNTSRYC~TS~LRKADCLTFS~~~~FSQGYVVCFDPLDGSSNIDCLASIGTIFSIYK  
KT~~~TEGEPTEKDAL~~~~~QPGRNIVAAGYALY  
GSATMLVLATE~~CGVNC~~FML~~~DPAIGE FILVNDVKIKKKNIYSLNEGYAKY~S  
DEAVTEYLQKK~KFPE~DGSSPYGARYVGSMAVADVHRTLVYG~GIFLYPAN~~~VKSPKG  
KLRLLYECNPMAFIMEKAGGMAT~NGLE~SVLDVVPESIHQRMPVALGSPDDVQEYINIY

K

>C\_elegans\_G5EBJ7  
ELTALLTNMLVAIKAIASATQKAGLAK~LYG~~IAGATNVQGE~~VKKLDVLSNELMIN  
MLKSSYTTCLLV~SEENDELIEVEE~~QRRGKYIVTFDPLDGSSNIDCLVSI GTIFGIYK  
KR~~~GDGPATVDDVL~~~~~KPGKEMVAAGYALY  
GSATMVVLSTG~~DGVNG~~FTL~~~DPSIGE FILTHPNMKCKEKGSIYSLNEGYAQT~W  
SKGFAEYIRTR~KYPE~AGKKAMGQRYVGSMAVADVHRTILNG~GIFLYPPT~~~VSAPNG  
KLRLLYECNPMAYII EQAGGLAT~TGKE~RILDIOPTQIHQRAPIILGSKLDVEEALEYL

A

>A\_thaliana\_Q9MA79  
DFTILLSHIVLGCKFVCSAVNKAGLAK~LIG~~LAGETNIQGE~~QKKLDVLSNDVFN  
ALVSSGRTSVLV~SEEDDEATFVEP~~SKRGKYCVVFDPLDGSSNIDCGVSI GTIFGIYT  
LD~~~HTDEPTTADVL~~~~~KPGNEMVAAGYCMY  
GSSCMLVLSTG~~TGVIYV~~FTL~~~DPSLGEFILTHPDIKIPNKGNIYSVNEGNAQN~W  
DGPTTKYVEKC~KFPP~DGSPAKSLRYVGSMAVADVHRTLLYG~GIFLYPAD~~~KKSPNG

KLRVLYEVFPMSFLMEQAGGQAF~TGKK~RALDLVPEKIHERSPIFLGSYDDVEEIKALY  
A

>O\_sativa\_Q0JHF8

DLTILLSHIVLGCKFVASAVNKAGLAK~LIG~~LAGETNVQGEE~~QKKLDVLSNEVFVK  
ALVSSGRTCVLV~SEEDDEEATFVDP~~ALRGKYCVCFDPLDGSSNIDCGVSI GTIFGIYM  
IK~~~DKENVTLEDVL~~~~~QPGKNMVAAGYCMY  
GSSCTLVVLSTG~~NGVNG~~FTL~~~DPSLGEFILTHPDIKIPKKGKIYSVNEGNAKN~W  
DEPTAKFVEKC~KFPK~DGSSPKSLRYIGSMVADVHR TLLYG~GVFLYPAD~~~KKS PNG  
KLRVLYEVFPMSFLMEQAGGQSF~TGKE~RALDLVPTKIHERSPIFLGSFEDVEEIKGLY  
A

>Pp1s1\_300V6\_2

DLTILLNNIVLGCKFVCSVSKAGLAK~LIG~~LAGETNVQGEE~~QKKLDVLSNHVFIN  
ALVSSGRTNVLV~SEENEEAIFVES~~SKRGYCVVFDPLDGSSNIDCGVSI GTIFGIYM  
LK~~~EGASGTVEDVL~~~~~QPGTAMLAAGYCMY  
GSSCTLVVLSTG~~AGVNG~~FTL~~~DPSLGEFILTHPNIKIPKKGKIYSVNEGNAKH~W  
DGPTTKYVENA~KFPK~DGSSPKSLRYIGSMVADVHR TLLYG~GIFMYPGD~~~KKS PKG  
KLRVLYEVFPMSFLVEQAGGQSF~TGKQ~RALEL VPAHIHDRSPIFLGSSDDVEEIKALY  
A

>D\_alaskensis\_Q30ZN0

QFTALLYDLILAAKIISKSVNKAGLLD~VLG~~GTGQVNVQGEH~~VQKLDEYANRVLIH  
RMERTGVLCA MA~SEENADLIRVPE~RFEAGDYILIFDPLDGSSNIDVNI NVGTIFSILK  
RK~~~PGASGSKDVT LGDVL~~~~~QSGVEQVAAGYFLY  
GPSTMLVYSSG~~QGVHG~~FTL~~~DPSVGEFLLSHPDIRYPEQGRIYSVNESYWHY~W  
DEPTREVVS YF~KGPDNPLGKPYSLRYVGS L VADFHRNLFY G~GIFMYPMDYRLPEK PQG  
KLRLMCEASPLAFLAEQAGGRAT~DGTK~RILDIVP GELHQRVPLF IG SAGDVDAVEAIY  
R

>Pp1s385\_43V6\_1

DLTILLNNIVLGCKFVCSVSKAGLAK~LIG~~LAGETNVQGEE~~QKKLDVLSNDVFIN  
ALVSSGRTNVLV~SEENED AIFVEP~~SKRGYCVVFDPLDGSSNIDCGVSI GTIFGIYM  
LK~~~EGASGTVEDVL~~~~~QPGTAMLAAGYCMY  
GSSCTLVVLSTG~~AGVNG~~FTL~~~DPSLGEFILTHPDIKIPKKGKIYSVNEGNAKH~W  
DGPTTKYVENA~KFPK~DGSSPKSLRYIGSMVADVHR TLLYG~GIFMYPGD~~~KKS PKG  
KLRVLYEVFPMSFLVEQAGGQSF~TGKQ~RSLDLVPAHIHDRSPIFLGSYDDVEEIKALY  
A

>Populus\_trichocarpa\_B9GTJ7

DFSILLNHIVLGCKFVCSAVNKAGLAK~LIG~~LAGETNVQGEE~~QKKLDVLSNEVFIK  
ALVSSGRTCILV~SEEDDEEATFVEP~~SKRGYCVVFDPLDGSSNIDCGVSI GTIFGIYM  
VK~~~DGHEPTLNDVL~~~~~QPGKNMLAAGYCMY  
GSSCMLVVLSTG~~SGVNG~~FTL~~~DPFLREFILTHPEIKIPKKGKIYSVNEGNAIN~W  
DGPTAKYVEKC~KFPE~DGSSAKSLRYVGS MVADVHR TLLYG~GIFLYPAD~~~KKS PNG  
KLRVLYEVFPMSFLMEQAGGQAF~TGKQ~RALDLVPTKIHERSPIFLGSYDDVEEIKALY  
I

>Populus\_trichocarpa\_B9H7R7

DFSILLNHIVLGCKFVCSVVKAGLAK~IIG~~LAGETNVQGEE~~QKKLDVLSNEVFIK  
ALVSSGRTCILV~SEEDDEEATFVEP~~SRRGRYCVVFDPLDGSSNIDCGVSI GTIFGIYM  
VK~~~DDHEPTLDDVL~~~~~QPGKNMLAAGYCMY  
GSSCTFVLSTG~~TGVNG~~FTL~~~DPSLGEFILTHPDIKIPKKGKIYSVNEGNVRN~W  
DGPTAKYVEKC~KFPQ~DGSSAKSLRYIGSMVADVHR TLLYG~GIFLYPAD~~~KKS PNG  
KLRVLYEVFPMSFLMEQAGGQAF~TGKQ~RALDLLPTKIHERSPIFLGSYDEVEEIKALY  
A

>Tetrahymena\_thermophila\_TTHERM\_00058590

DFTLLLSSIQTACKFISSKVKKAGIAK~LYG~~HHGTENSSGDQ~~VKKLDILSNEVFN  
CLRSSGKVAIMA~SEEDDKPIEVEI~~KNQGYVVSFDPLDGSSNIDANVSI GSI FAIWR  
RQT~EEETGATIEDLL~~~~~QDGRSLVAAGYCLY  
GSSTHLVLC TG~~HQVNG~~YTL~~~DPSLGEFLLTHPDIKIPKRGNIYSINEGNSTY~W  
DESVKEYIQAK~KFPT~DGTSPYSLRYIGSMVADVHR TLLYG~GIFLYPTD~~~KRSPKG  
KLRVLYECPMAYIVEKAGGKAI~TGEC~NVLDIKPKSIHERCGIICGSVEDVTEIENIY  
K

>T\_erythraeum\_gi\_499929778

DISSLMNRIGLAGKLIARRLTRAGLLEDTLG~~FTGTVNVQGES~~VKKMDIYANDVFIS  
VFKQSGLVCRLA~SEEMEKPYIPE~NCPIGRYTLLYDPLDGSSNLDTNLNVGSIFSVRQ  
QE~~~GNDENGLAQDLL~~~~~QNGHKQIAAGYILY  
GPSTMLVYSIG~~QGVHA~~FTL~~~DPSLGEFILVNIENIKIPEHGPVYSVNEGNFWQ~W

DDSMRDYIRYV~~~~~HRHEGYTARYGGALVGFHRIYQG~GVFLYPGT~~~VKKPEG  
KLRLLYESAPMGYLVEQAGGRAS~TGTE~EILDVVADQLHQRTPLIIGSKEDVALVESFI  
K

>Synechococcus\_elongatus\_Q5N163

DLAALMQRIGLAAKLIARRLSHAGLVDDALG~~FTGEINVQGEA~~VKRMDVYANQVFIS  
VFRQSGLVCRLA~SEEMEKPYIPE~NCPIGRYTLLYDPLDGSANVDVLDLNVGSIFAVRR  
QE~~FYDESHEAKDLL~~~~~QPGRQIAAGYVLY  
GASTLLVYSMG~~QGVHV~~FVL~~~DPSLGEFVLAQSDIQLPNSGQIYSVNEGNFWQ~W  
PEGYRQYIREM~~~~~HRREGYSGRYSGALVADFHRILMQG~GVFLYPET~~~VKNPTG  
KLRLLYEAPMAFLAEQAGGKAS~DGQK~PILLRQPQALHERCPLIIGSAADVDFVEACL  
A

>Anabaena\_variabilis\_Q3MCI4

DLSALMNRIALAGKLVARRLSRAGLMEGVLG~~FTGEVNVQGES~~VKKMDVYANDVFIS  
VFKQSGLVCRLA~SEEMDEPYIPE~NCPVGRYTLTYDPLDGSNTDTNLSLGSIFSIRQ  
QE~~GDDSDGQAKDLL~~~~~TNGRKQIAAGYIILY  
GPSTMLVYTMG~~KGVHS~~FTL~~~DPSLGEFILSEENIRIPDHGAVYSVNEGNFWQ~W  
EESMREYIRYV~~~~~HRTEGYTARYSGAMVSDIHRILVQG~GVFLYPGT~~~VQNPEG  
KLRLLYESAPLAFLIQAGGRAT~TGLV~DILDVVPKLLHQRTPLIIGSKEDVAKVESFI  
Q

>Agrobacterium\_rhizogenes\_A8W040

ALASLVESIAASAIVVADHLKEAAFQN~HIG~~SSGTTNVQGED~~QKLLDVLADRFR  
TCGEAVSLAAYV~SEEAEEVTLWKP~~PAAGDLILYVDPLDGSNLEVNLSVGSIFAVSQ  
VQ~~~~~ADGDTNVL~~~~~RKGREYLCAGYAIY  
GPSTLFFVITFG~~LGVVG~~FTL~~~DPSDQFKLTNARMVPTETTEFAVNSSRQRF~W  
DEPIRRYVDECLAGSAGPRGQDFNMRWTASMVADVHRILTRG~GVFLYPADES~NRRAGG  
KLRLMYEANPMAFLVEAAGGAAS~TGTE~DILRIQPQAHHQVRSVLLGSSNEIQRLVQFH  
Q

>Bradyrhizobium\_A5E987

PLAITVTALAFVAETLAGVISSGPLNG~RLG~~EEVGANS DGDR~~QKKLDVVADELFA  
ALAPT~PVRWYA~SEERPTAEMLNP~~~~EGTLALAI DPLDGSNIDVNISIGTIFSVFE  
AK~~~~~ESGVESFL~~~~~RPGREQIAAGYVVY  
GPQTVFILATR~~TTLAQ~~FVL~~~HR~~GHFFLVSDSLRIPDRTEFAINASNYRH~W  
SRPIRAFVDDCIAGDEGPWGENFNMRWVASLVAETHRILTRG~GIFLYPADAR~RGYGGQ  
RLRLVYECAPAFIVERAGGKAT~DGID~RILDLPSELHQRTPLVFGTAEKVSQVCAYH  
D

>Bradyrhizobium\_A5EQ67

DCAAVIEALADAARELARQIAIAPLAGFDEG~~~AATVNADGDV~~QKALDIVADNLMRD  
ALRKAPVAGI~L~SEEVDRPETVNA~~~~AAPLCVAIDPLDGSNQLQNNISVGTIFSI  
RG~~~~~RDVLSFF~~~~~EPGTAQRAAGFFVY  
GPQTCVLVAID~~HRVDL~~YVL~~~HPTLREFVLARSGLRIPQDTPEFAINASNRRH~W  
SGTVRNYVDECLAGAAGPRGRDFNMRWIASLVAEAYRILMRG~GVFLYPADSR~PGYREG  
RLRLVYEAHPMALIMEWAGGSAS~SGRS~RILELSARS PHQRAPLIMGDVRLVRDQV  
LH  
E

>Methanogenium\_boonei\_A7I8R6

NLAELILFLSGQAREVKKGFLS~~~TCMNTG~~ACGTQNMFGED~~QKPLDKYADDVFIH  
ALQKSRLVRYIA~TEEQDHVIEVSG~~~AKNQFGVVIDPLDGSLLDVLNLCVGSIIIGIYP  
GH~~~~~VL~~~~~EKGTKMIAALYMLY  
GPLTLLTFTTK~~HGVHE~~FV~~~QCETGEFVLRHENLKIPE~GKIQSPGALRRD~~Y  
LTAHAQWISCL~~~~~ENEGYKLRFSGCFVADVHQILHKG~GVFSYPGY~~~KKGESG  
KLRLLYEANPMGMIVCEAGGAAS~NGHT~DYREIVPSAIGQVTPLYIGGKKEIAKIESCM  
R

>Methanogenium\_labreanum\_A2ST39

DLGKIIMMIADQAGPIRSAFIS~~~~~NQN~~YAGSTNSSGED~~QAEMDTWADTRITS  
VLQESGLVRSIA~SEEQEDITMSP~~~~SAKYSVMDPLDGSLLIKVNLTVGTIVGIYE  
GD~~~~~VL~~~~~QAGNKLRAAFYMLY  
GPLTLLTISLG~~NGVSI~~FAM~~~NEE~GTYVLLKENVRIPE~GTLGSGGLRPE~~W  
TEKHIQYMNAI~~~~~ECEGGKNRYSGSFVADFHQILEYG~GVYAYPAT~~~KKSASG  
KLRLVFEINPIGFLAVQAGGAVS~NGES~STLEIVPTKVHQRTPVYVGSKGMIAKIEAIR  
~

>Haloarcula\_marismortui\_Q5V3Z1

VIDTIVATTPDVRRAVAD~~~~~YRG~~QSNSVNPTGDD~~QLAADLRADELFEQ  
RVLGIDGVASYA~SEERADVKT TDG~~~~~RLHVAMDPLDGSNLEPNMGMGTIFGIYS  
EQPP~~~~~TVGTNLLAAGFVIY

GPITSMVWARD~~GSVRE~~YIL~~~~ED~GDKRVVDDDVTVPE~DPTVFGFGGGVDS~W  
TDEFESYAEAV~~~~~RHE~LKLRYGGAMVADINQVLTYG~GIFSYPAL~~~~ESRPEG  
KLRVQFEGHPMAYILESAGGRSS~DGDQ~SLLEIEPDELHERTPLYLGNDDLIDRLEANI  
D

>Haloarcula\_marismortui\_Q5V311

TLDEIERAVKDTAHYVSGNLAN~~~~~YAN~~RAAGENPSGEQ~~QVGGDVWADDLFFD  
ALAYIDGIGAYA~SEERSDVV~DCG~~~~~EGYSIAIDPLDGSSNLASNSVGTIIGVYD  
AELP~~~~~AAGREMVASLMVLY  
GPYTTLTIARSDRDVVQE~~HLL~~~RDGHSERWQFELPAEATVVGLAGKTGERSDA~F  
NDIAQSFERDL~~~~~KLRYGATVADLAQVLEYG~GLFGYPVT~~~SGYPNG  
KLRVHFESAPLAYLVEAAGGASS~DGSQ~SLLDVEPDGIHRTPTFLGNAELVDELEAAL  
S

>Pp1s41\_162V6\_2

NLARLLVCMGEALRTIAFKVRTA~~~~~SCG~~ATACVNTFGDE~~QLAVDMLADKLLFE  
ALRHS~HVCKYACSEEEPILQDMEG~~~~~EGFSVAFDPLDGSSIVDTNFTVGTIFGVWP  
GD~~~~~KLTG~~~~~ITGRDQAAASAMGIY  
GPRTTYVVAINGFPGTHE~~FLL~~~~MDDGKWQHVKETTEIKE~GKLFSP~~GNLRATF  
DNADYEKLINYY~~~~~VSEKYTLRYTGGMVPDVNQIIVKERGIFTNVT~~~~SPTKA  
KLRLLFEVAPLGLLIENAGGYSS~DGKQ~SVLDKVVVNTDDRTQVAYGSRDEIRFEETL  
Y

>Pp1s429\_29V6\_2

KLARLLVCMGEALRTIAFKVRTA~~~~~SCG~~ATACVNTFGDE~~QLAVDMLADKLLFE  
ALRYS~HVCKYACSEEEPVLQDMEG~~~~~EGFSVAFDPLDGSSIVDTNFTVGTIFGVWP  
GD~~~~~KLTG~~~~~ITGRDQAAASAMGIY  
GPRTTYVIAINGFPGTHE~~FLL~~~~MDDGKWQHVKETTEIKE~GKLFSP~~GNLRATF  
DNADYEKLINYY~~~~~VSEKYTLRYTGGMVPDVNQLIVKERGIFTNVT~~~~SPSTKA  
KLRLLFEVAPLGLLIENAGGYSS~DGKQ~SVLDKQVVNTDDRTQVAYGSRDEIRFEEML  
Y

>C\_reinhardtii\_P46284

KLRHVMSMAEATRTHIAHKVRTA~~~~~SCA~~GTACVNSFGDE~~QLAVDMVADKLLFE  
ALKYS~HVCKLACSEEVPEPVDMMGG~~~~~EGFCVAFDPLDGSSSDTNFAVGTIFGVWP  
GD~~~~~KLTN~~~~~ITGREQVAAGMGIY  
GPRTVFCIALKDAPGCHE~~FLL~~~~MDDGKWMHVKETTTHIGE~GKMFAP~~GNLRATF  
DNPAYERLINIFY~~~~~LGEKYTLRYTGGIVPDLFQIIVKEKGVFTNLT~~~~SPTKA  
KLRILFEVAPLALLIEKAGGASSCDGKAVSALDIPILVCDQRTQICYGSIGEVRRFEEYM  
Y

>Mesataenium\_endlicherianum\_WDCW\_2047154

DLARLMVCMGEALRTIAFKVRTA~~~~~SCG~~ATACVNTFGDE~~QLAVDLLADKLLFE  
ALKFS~HVCKYACSEEVPELVDMGG~~PDEGGFSVAFDPLDGSSIVDTNFTVGTIFGVWP  
GS~~~~~KLTG~~~~~VTGRDQVAAAMGIY  
GPRTTYVLTIAGYPGTHE~~FLL~~~~QDDGKWMHVKETTTHIGE~GKLFSP~~GNLRATF  
DNPEYKELINFW~~~~~VNEKYTLRYTGGMVPDVNQIIVKEKGVFCNAN~~~~SPSTKA  
KLRLLFEVAPLGLLVEQAGGYSS~DGFI~SVLDKNIEFTDVRTQVCYGSKNEVQRFEEYL  
Y

>O\_sativa\_Q01M83

NLIRLLICMGEAMRTISFKVRTA~~~~~SCG~~GTACVNSFGDE~~QLAVDMLADKLLFE  
ALEYS~HVCKYACSEEVPELVDMGG~~PVDGGFSVAFDPLDGSSIVDTNFTVGTIFGVWP  
GD~~~~~KLTG~~~~~VTGGDQVAAAMGIY  
GPRTTYIIALKDCPGTHE~~FLL~~~~LDEGKWQHVKDTTTTIGE~GKMFSP~~GNLRATF  
DNPEYDKLINYY~~~~~VKEKYTLRYTGGMVPDVNQIIVKEKGIIFTNVT~~~~SPTAKA  
KLRLLFEVAPLGLFLIEKAGGYSS~DGKQ~SVLDKVINNLDERTQVAYGSKNEIRFEETL  
Y

>A\_thaliana\_P46283

GLRLLMCMGEALRTIAFKVRTA~~~~~SCG~~GTACVNSFGDE~~QLAVDMLADKLLFE  
ALQYS~HVCKYACSEEVPELVDMGG~~PVEGGFSVAFDPLDGSSIVDTNFTVGTIFGVWP  
GD~~~~~KLTG~~~~~ITGGDQVAAAMGIY  
GPRTTYVLAVKGFPGTHE~~FLL~~~~LDEGKWQHVKETTEIAE~GKMFSP~~GNLRATF  
DNSEYSKLIDYY~~~~~VKEKYTLRYTGGMVPDVNQIIVKEKGIIFTNVT~~~~SPTAKA  
KLRLLFEVAPLGLLIENAGGFSS~DGHK~SVLDKTIINLDDRTQVAYGSKNEIRFEETL  
Y

>Osmunda\_UOMY\_2008522

NLARLMVCMGEALRTIAFKVRTA~~~~~SCG~~ATACINTFGDE~~QLAVDLLANKLLFE  
ALQYS~HFCKYACSEEDPELLDMGG~~PAEGGYSVAFDPLDGSSIVDTNFTVGTIFGVWP

GD~~~~~KLTG~~~~~VTGRDQVAAAMGIY  
GPRTTYVLALKDAPGTHE~~FLL~~~~LDDGKWQHVKETTEIGE~GKLFSP~~GNLRATF  
DNPEYEKLINYY~~~~~VGEKYTLRYTGGMVPDVNQIIVKEKGVFTNVS~~~~SPTTKT  
KLRLLEFEVAPLGLLIEKAGGFSS~DGKQ~SVLSDKVILSTDDRTQVAYGSKNEIIRFEETL  
Y

>H\_ciliata\_YWNF\_2050342

SLARLMVSMGEALRTIAFKVRTA~~~~~SCG~~ATSCVNTFGDE~~QLAVDMLADKLLFE  
ALRHS~HVCKYACSEEEPILQDMKG~~~~~EGFCVAFDPLDGSSIVDTNFTVGTIFGVWP  
GD~~~~~KLTG~~~~~INGRDQAASAMGIY  
GPRTTYVIAIKGFPGTHE~~FLL~~~~MDDGKWTHVKETTEIKE~GKLFSP~~GNLRATF  
DNPEYEKLINYY~~~~~VSEKYTLRYTGGMVPDVNQIIVKERGIFTNVI~~~~SPTTKA  
KLRLLEFEVAPLGLLIENAGGYSS~DGKQ~SVLDRMVVNTDDRTQVAYGSKDEIIRFEETL  
F

>Populus\_trichocarpa\_A9PF94

GLIRVMCMGEALRTIAFKVRTA~~~~~SCG~~GTACVNSFGDE~~QLAVDMLANNLLFE  
ALTHS~HFCKYACSEEVPELQDMGG~~~PVEGGFSVAFDPLDGSSIVDTNFSVGTIFGVWP  
GE~~~~~KLTG~~~~~VTGRDQVAAAMGVY  
GPRTTYVLALKDYPGTHE~~FLL~~~~LDEGKWQHVKETTEVGE~GKLFSP~~GNLRATF  
DNPDIYEKLINYY~~~~~VKEKYTLRYTGGMVPDVNQIIVKEKGVFTNVI~~~~SPTSKA  
KLRLLEFEVAPLGLLVEKAGGYSS~DGHK~SVLDKEIINLDDRTQVAYGSKNEIIRFEETL  
Y

>Tetrahymena\_thermophila\_I7LSW7

SLQKIYIALLDSEFIELADLLRFH~~~~~ACGRKEAGSQNAFGDI~~QLECDTKSDEIIFN  
HLKKT~GEVAYGLSEEQPKLVELGG~~~~~NKYIVTFDPLDGSSIIICNWTVGTIFGIWK  
ND~~~~~EKVLIG~~~~~HKTKDLIASGCCMY  
GPRTTAVIYNEKTKTVNE~~YSLTLNKQKQVEWILSLPNIVIKPQKLFAP~~GNLRAAS  
ENPNYRQCINNW~~~~~IDQGYTLRYTGGMVPDIYQIFIKGSGIFTTIS~~~~SKSHAV  
KLRVLYEVAPLAHLVEMAKGKSS~DGKN~SLMELEVTSYDQRSIIIVGSTEEVDKILSTL  
N

>Arcobacter\_butzleri\_A8EU55

~MQEIMKAIEESAIIKIKHLIETG~~~~~DTG~~KSEFENSTGDT~~QLKLDIASDKIIE  
IFKNI~PSIKAIIVSEEQEAIVNLHE~~~~~NGKYLIAYDPLDGSSLVVDVNLVSVGSIFGIYE  
NE~~~~~FNAQNIVASVYVVF  
GPRVEMVVTT~~~TDVKM~~YRL~~~~~LDGKFTFIQ~NIKLNEKGLNAP~~~GSTQNC  
WAPFHKQLIDDI~~~~~FNDGYRLRYSGGMVPDLHQILLKGGGLFSYPGT~~~SDKPKG  
KLRQLFEVFPFALAYEKAGGQAV~DGFK~RVLEVQTTTHIHDTTPCFFGSNSEINRVLEVY  
K

>Helicobacter\_hepaticus\_Q7VGH7

MISIIIDSLRESALHIDSLKDT~~~~~STS~~YLSINASGDM~~QLEIDVRVDKFLSE  
KLLNL~PCVKAICSEEQEEIMYSEN~~~KNAPYIIAYDPLDGSSLIDSNLSIGTIFGIYN  
EE~~~~~LSAKHLIASGYIIY  
GPRLEMVVAQE~~~QALH~~~YRY~~~~~NGNMWRNLGALALNTKGINAP~~~GGTQKH  
WENKHKAMIESL~~~~~FAQGYRLRYSGGMVPDLHQILLKGGGLFSYPAT~~~SDAPNG  
KLRKLFVFPFVYKAGGFAT~NGTY~RILELEVAHLHDSTPCFFGSQSEMNLVKEVY  
E

>Campylobacter\_curvus\_A7GXH6

DLNEIFETIKSVAKEISEVIKYA~~~~~DLG~~YTTHENATGDT~~QLKLDVQSDEIITA  
KFKAL~SCVKALVSEEKDEILPINT~~~~~NGKFIIAYDPLDGSSLVVDVNFVAVGSIFGIYE  
NE~~~~~LKPQNLIAAAYSIIY  
GPRLELVINDK~~~KGTKPKFYRL~~~~~GKDGNFKVVRE~LELAQKGLNAT~~~GATQKG  
WSKTHRNFINEL~~~~~FDEGYRLRYSGAMVSDLHQILLKGGGLFSYPAT~~~SDHPNG  
KLRLLEFVLPFAFIYENAGGTTS~DGKSDTLFDVNITKTHQTSPCFFGSASEIALLHKFY  
G

>Aeromonas\_salmonicida\_A4SM33

ELTSLSSIRLAAKVVNREINKAGLAD~IIG~~SMGAENVQGEV~~QQKLDVYANERFKA  
ALEARGEVCGIA~SEEEEDFVSFDSELSRHSKYVVLIDPLDGSSNIDVNVSVGTIFSIYR  
RLSA~PGTGVTLDFL~~~~~QPGNRQVAAGYVVY  
GSSTMLVYTTG~~~FGVNG~~FTY~~~DPSIGCFCLSHENIRIPEEGKIYSINEGNYIK~F  
PDGVKKYLKYC~QERDEATHRPYTSRYIGSLVSDFHRNLLKG~GIYIYPSG~~~TNSPNG  
KLRLLYECNPMAFLVEQAGGKAS~DGFG~RIMDIQPTALHQRTPYFVVGSTKMVERAEAFM  
R

>Photobacterium\_profundum\_Q6LV59

DLSSLLGSIKLAIVNREINKAGLVD~ITG~~AIGSENVQGEV~~QQKLDLYANDKFKA

AMEARDQVCGVA~SEEEDEAVTFNKDLNRNAKYVILMDPLDGSSNIDVNVSVGTIFSIYR  
RVSP~IGTTPTQDDFL~QPGNQQVAAGYVIY  
GSSTMLVYTTG~NGIHG~FTY~DPSLGVFCLSHENMQIPEDGQIYSINEGNYIR~F  
PQGVKKYIKFC~QEDVPADNRPYTSRYIGSLVSDFHRNLLKG~GIYMYPST~AMYPNG  
KLRLLYECNPM AFLMEQAGGVAS~DGKN~RILDITPTELHQRVFFVVGSTNMVKQVESFI  
E
